# Supplementary material for: Antimicrobial Activity of Selected Banana Cultivars Against Important Human Pathogens, Including Candida Biofilm
Source: MDPI journal article supplement (doi:10.3390/foods9040435), 2020-04-04
Supplement: s1 [file s1]

# Antimicrobial Activity of Selected Banana Cultivars against Important Pathogens, including *Candida* Biofilm

Ramin Saleh Jouneghani<sup>1‡</sup>, Ana Hortência Fonsêca Castro<sup>1,2‡</sup>, Sujogya Kumar Panda<sup>1,3\*</sup>, Rony

Swennen<sup>4,5,6</sup>, Walter Luyten<sup>1</sup>

## Supplementary material

**Table S1.** Extract yield (mg/mL) when 1 g dried material of each banana cultivar was extracted with 10 mL of four different solvents separately.

| ITC code  | Name            | Leaf |      |     |      | Pseudostem |      |     |     | Corm |      |     |      |
|-----------|-----------------|------|------|-----|------|------------|------|-----|-----|------|------|-----|------|
|           |                 | A    | W    | E   | H    | A          | W    | E   | H   | A    | W    | E   | H    |
| ITC0767   | Dole            | 2.1  | 13.8 | 3.6 | 3.1  | 2.9        | 29.7 | 3.5 | 15  | 2.5  | 21.7 | 2.7 | 17.1 |
| ITC0643   | Cachaco         | 5.8  | 17.9 | 5.2 | 8.8  | 2.5        | 27.9 | 3.1 | 9   | 2    | 17.7 | 2.2 | 14.4 |
| ITC1138   | Saba            | 5.3  | 20.6 | 3.7 | 7.7  | 2.5        | 32.2 | 3.9 | 8.7 | 1.6  | 16.8 | 3.2 | 8.9  |
| ITC0652   | Kluai Tiparot   | 5.5  | 21   | 4   | 9.3  | 2.2        | 25.2 | 4.3 | 8.4 | 1.9  | 15.7 | 2.6 | 9.3  |
| ITC0472   | Pelipita        | 5.8  | 19.8 | 4.8 | 7.9  | 2.6        | 29.6 | 3.8 | 2.7 | 1.7  | 18.4 | 2.4 | 14.8 |
| ITC0659   | Namwah Khom     | 4.8  | 23.3 | 5.3 | 15.7 | 2.5        | 27   | 4.1 | 7.2 | 2.1  | 9.6  | 1.9 | 4.3  |
| ITC0101   | Fougamou        | 5.7  | 24.1 | 6.2 | 11.4 | 3.3        | 27   | 7.4 | 4   | 6.2  | 16.1 | 2.5 | 12.5 |
| ITC0654 * | Petite naine    | 4.9  | 17.3 | 4.3 | 3.3  | 3.7        | 26.8 | 2.1 | 7.9 | 3.7  | 19.9 | 2.1 | 13.3 |
| ITC0346   | Giant cavendish | 3.7  | 17.7 | 4.6 | 8.2  | 2.1        | 22.9 | 3.4 | 7.8 | 1.5  | 10.1 | 2   | 8.1  |
| ITC1356   | Mbwazirume      | 3    | 12   | 6   | 3.6  | 2          | 10   | 4.8 | 2.7 | 4.6  | 8    | 2.2 | 1.4  |

**Note:** The dried residue of 1 mL extract was re-dissolved in 200  $\mu$ L of water (for the aqueous extract) or dimethyl sulfoxide (DMSO) for the organic extracts and tested against each pathogen. A- Acetone, W-Water, E-Ethanol, H-Hexane.

**Table S2.** Total phenolic content (gallic acid equivalents,  $\mu$ g/mg) of different extracts.

| ITC code | Name            | Leaf |     |     | Pseudostem |     |    |
|----------|-----------------|------|-----|-----|------------|-----|----|
|          |                 | A    | E   | H   | A          | E   | H  |
| ITC0767  | Dole            | 185  | 149 | 146 | 160        | 140 | ND |
| ITC0643  | Cachaco         | 246  | 163 | 181 | 109        | 149 | ND |
| ITC1138  | Saba            | ND   | ND  | 149 | 179        | ND  | ND |
| ITC0652  | Kluai Tiparot   | 184  | ND  | ND  | 152        | 169 | ND |
| ITC0472  | Pelipita        | ND   | ND  | ND  | ND         | 110 | 72 |
| ITC0659  | Namwah Khom     | ND   | 168 | ND  | ND         | ND  | ND |
| ITC0101  | Fougamou        | 147  | 24. | ND  | ND         | 309 | ND |
| ITC0654* | Petite naine    | ND   | ND  | 150 | ND         | 204 | ND |
| ITC0346  | Giant cavendish | 213  | 236 | ND  | 76         | 42  | ND |
| ITC1356  | Mbwazirume      | 178  | 187 | 154 | 135        | 176 | 73 |

**Note:** The phenolic concentration of extracts was evaluated from a gallic acid calibration curve (shown below) and data are expressed in gallic acid equivalents (GAE) as  $\mu$ g/mg of the crude extract. A- Acetone, E-Ethanol, H-Hexane, ND-Not determined (because extract showed little antimicrobial activity, or insufficient sample was left after bioactivity testing).

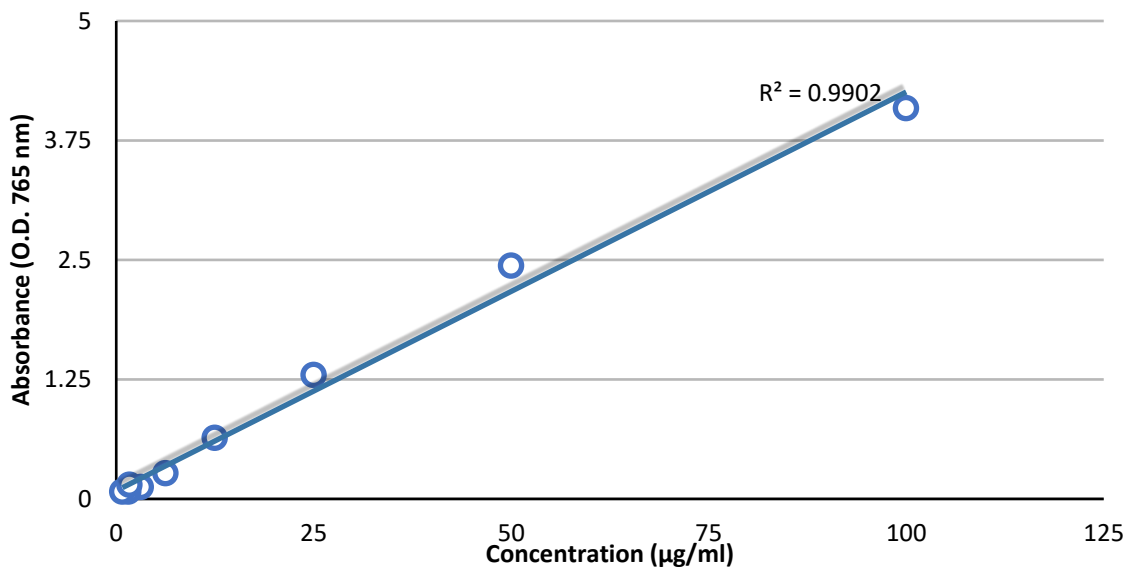

**Figure S1.** Regression curve for gallic acid assayed with Folin–Ciocalteu reagent. For details, see materials and methods..

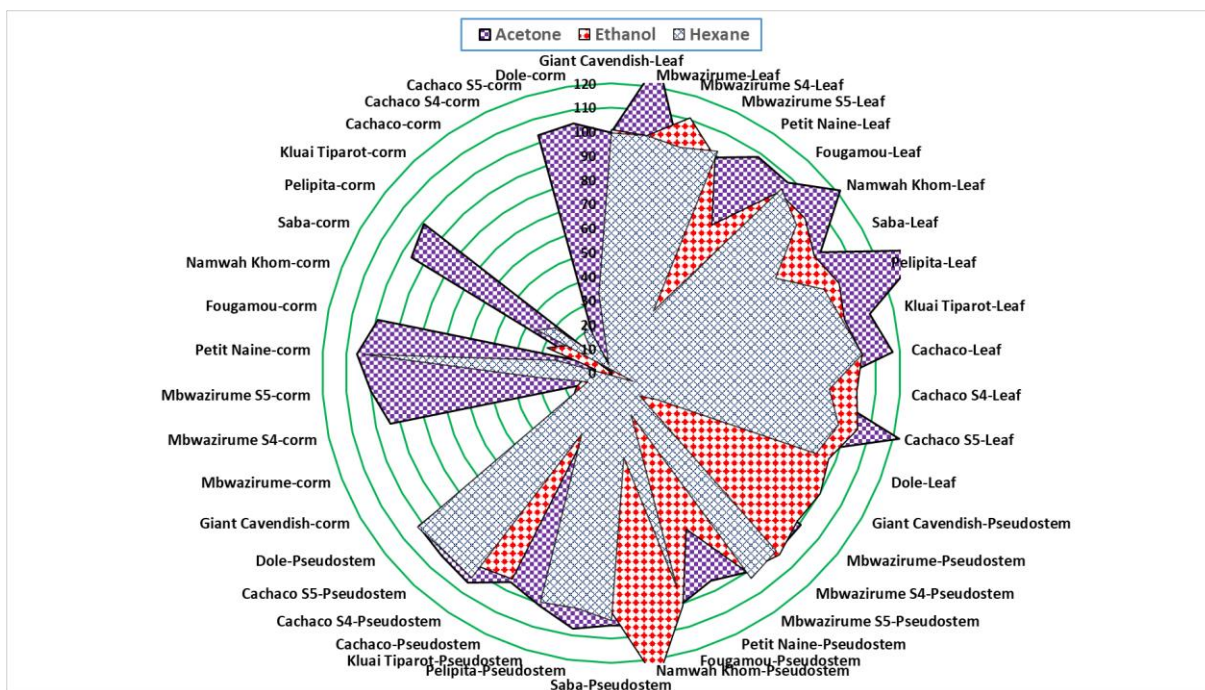

**Figure S2. A.** Antibacterial activity against *Bacillus cereus*.

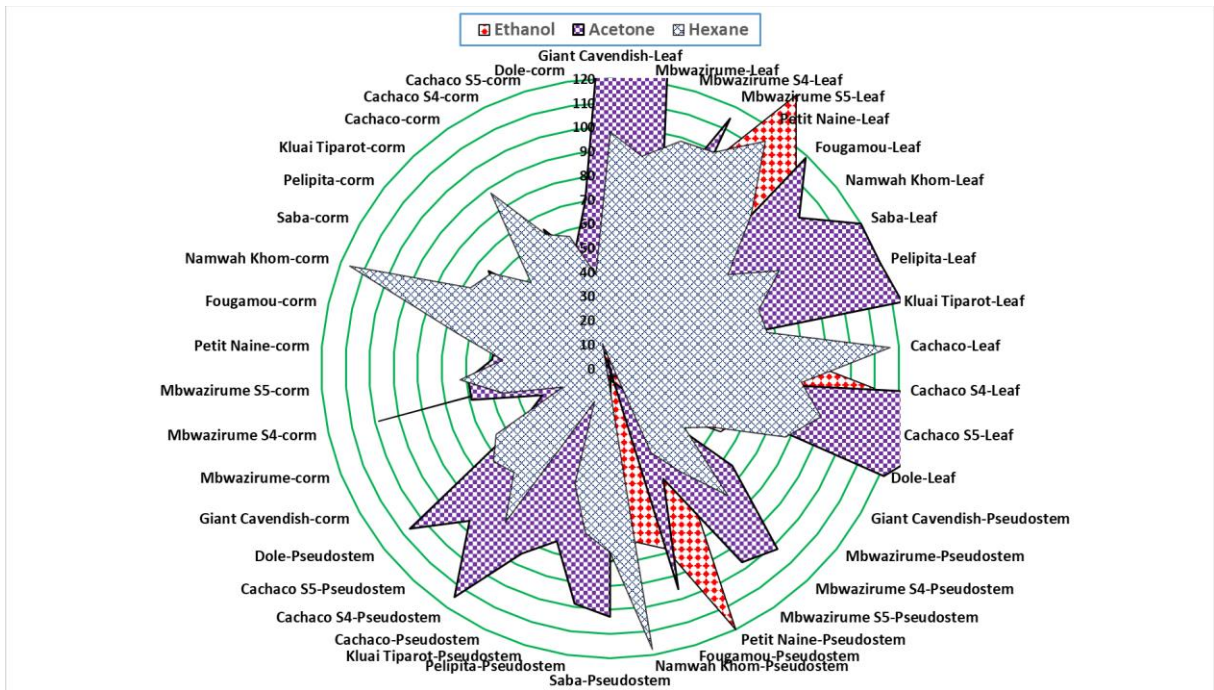

Figure S2. B. Antibacterial activity against *Micrococcus luteus*.

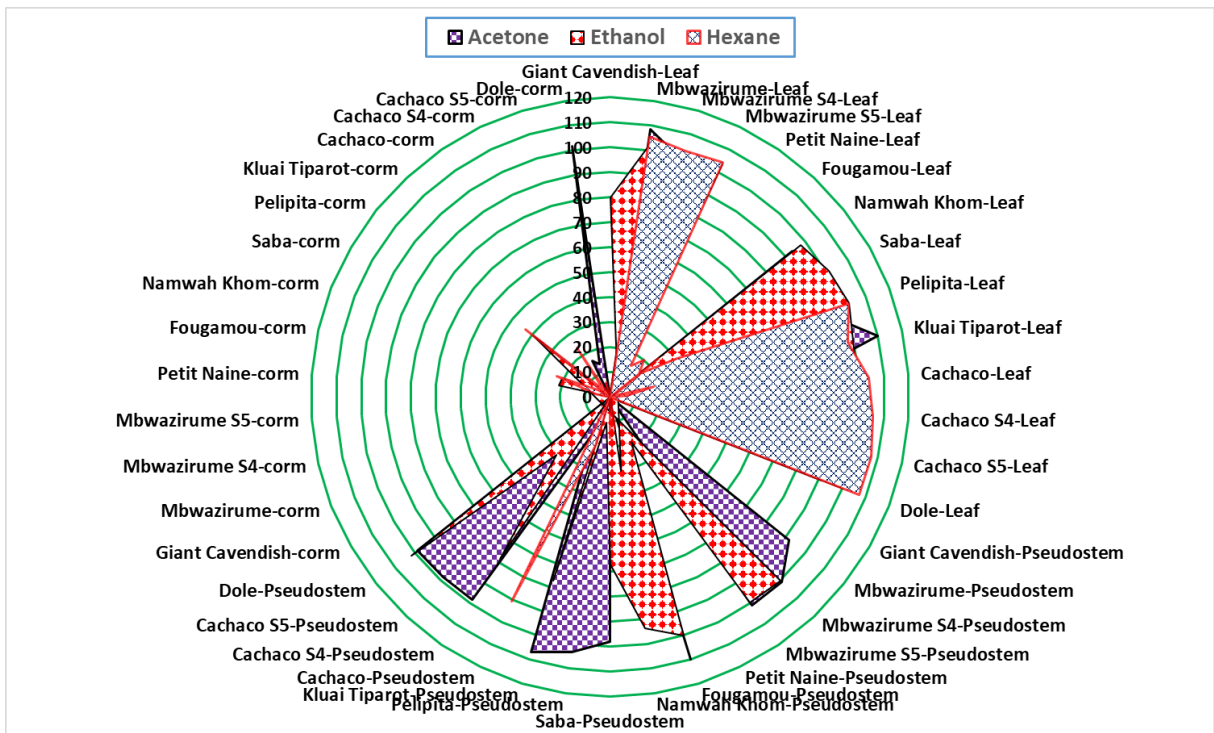

Figure S2. C. Antibacterial activity against *Staphylococcus aureus*.

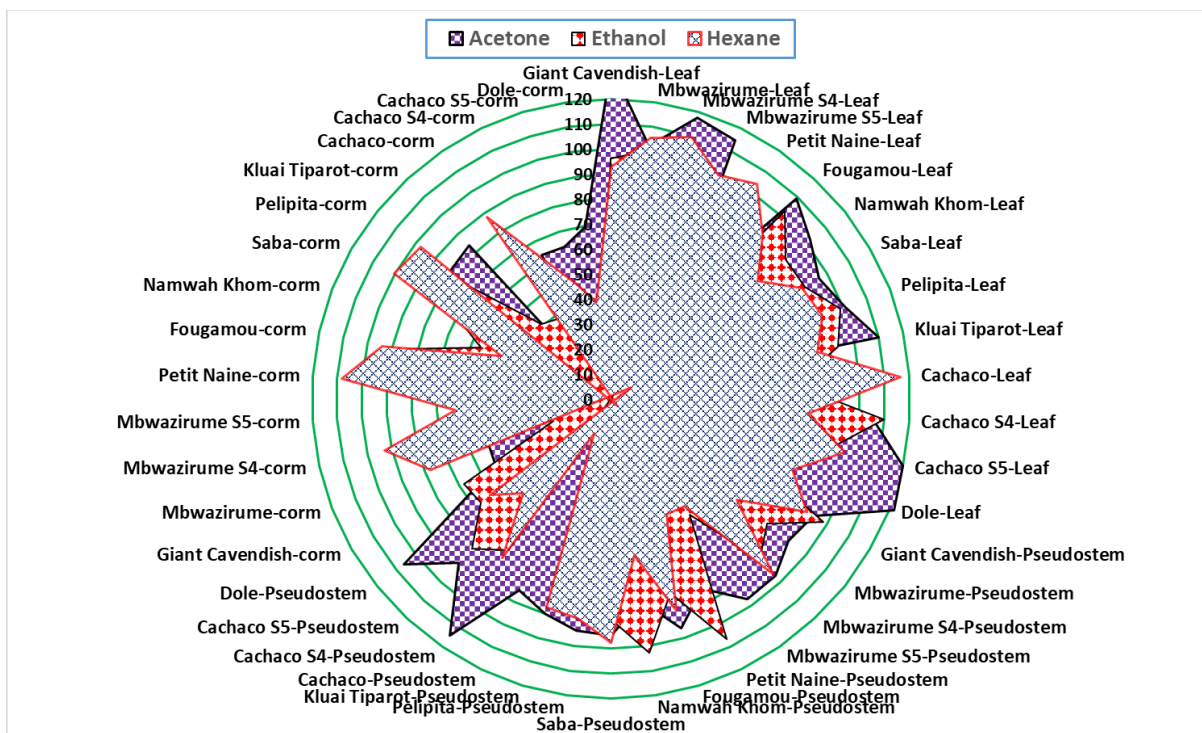

Figure S2. D. Antibacterial activity against *Streptococcus faecalis*.

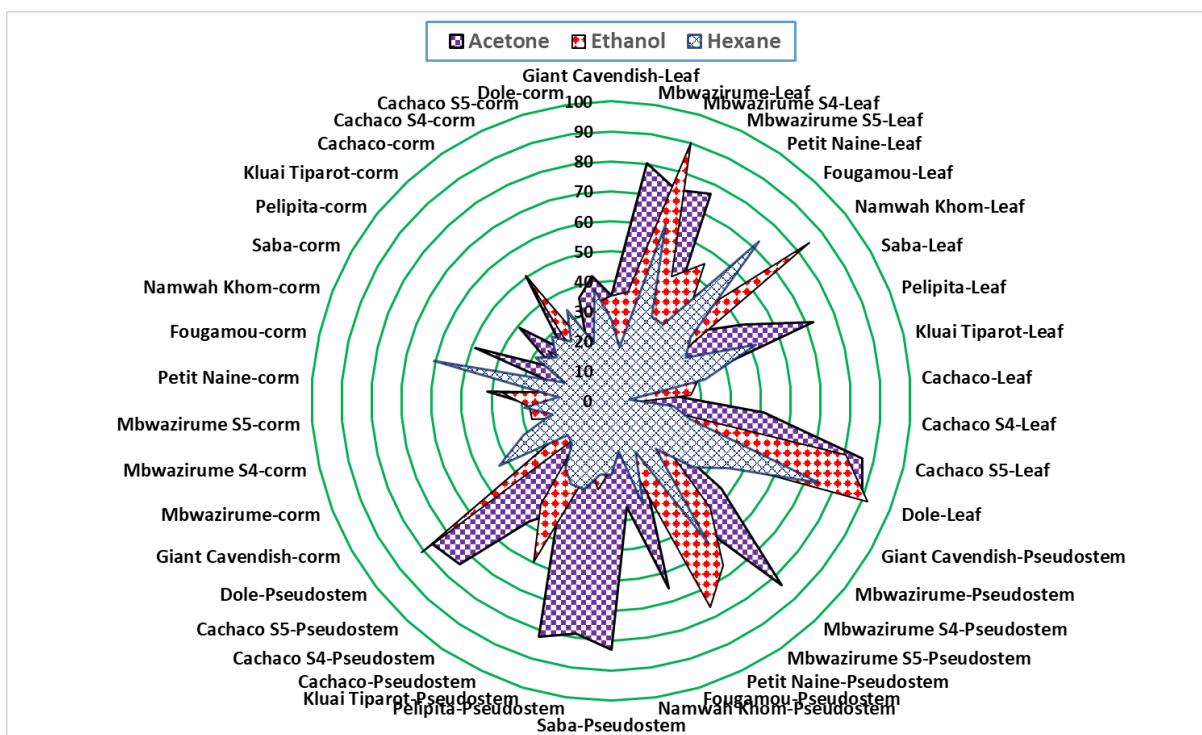

Figure S2. E. Anticandidal activity against *Candida albicans* biofilm.



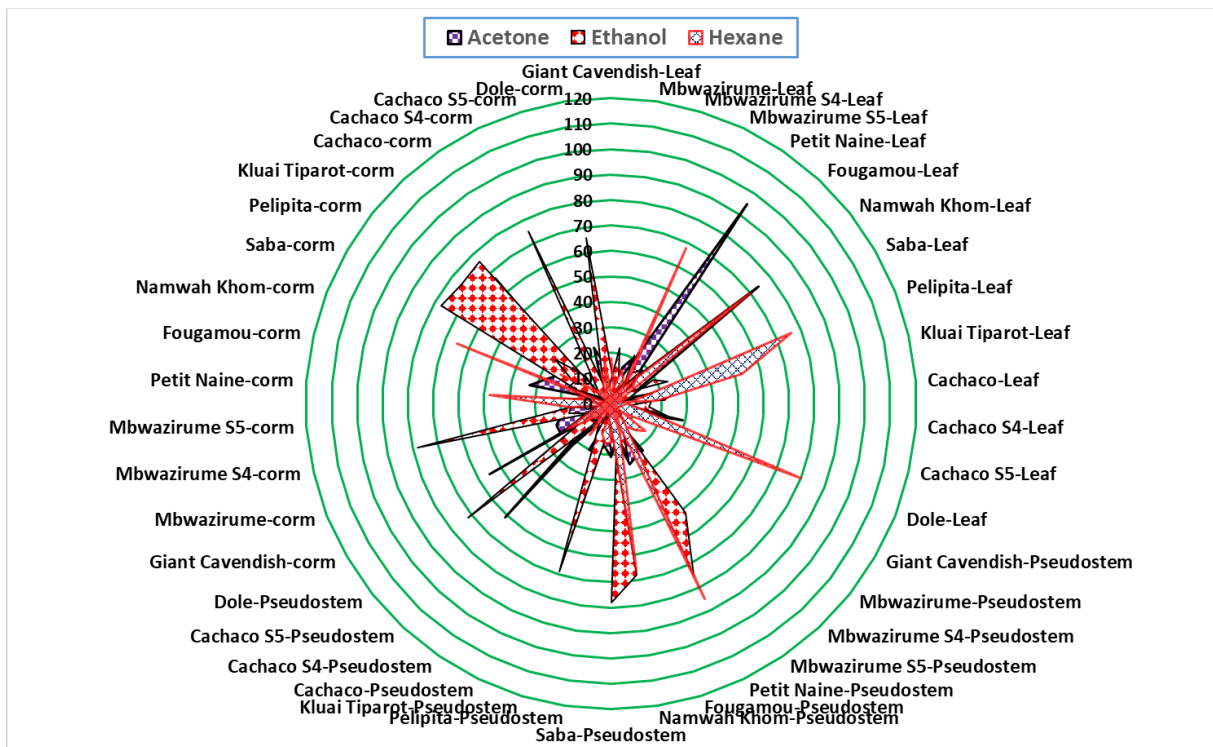

Figure S2. F. Antibacterial activity against *A. hydrophila*.

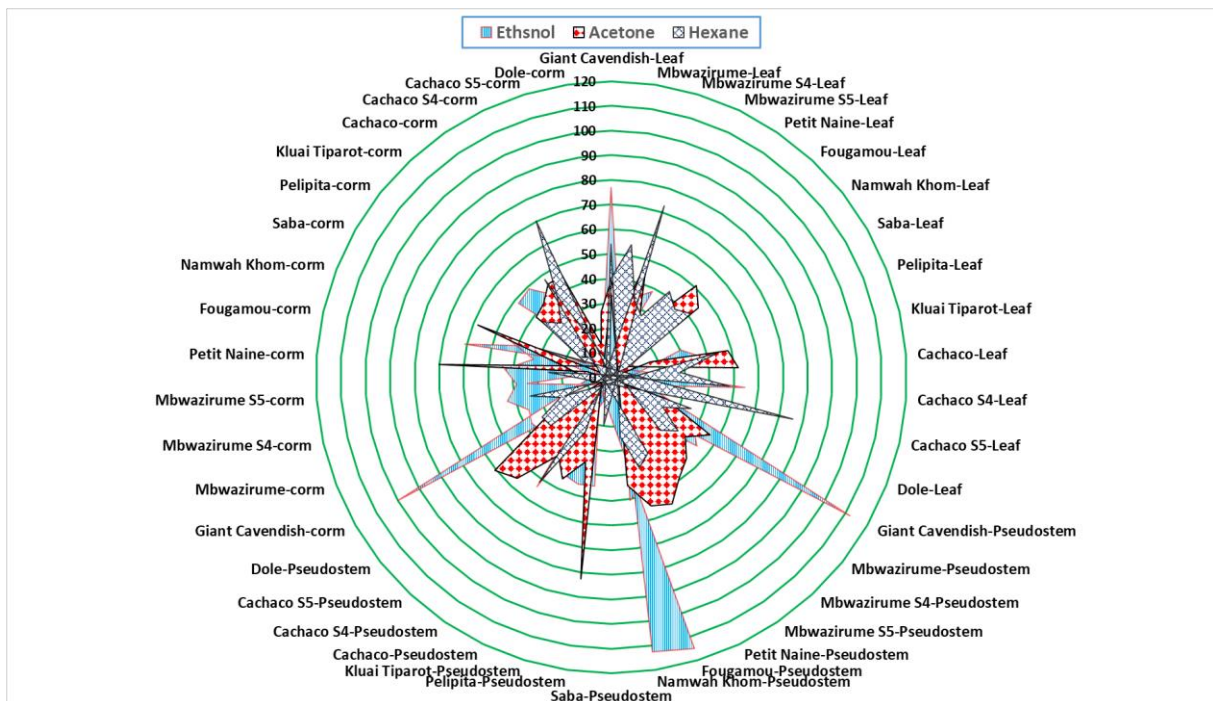

Figure S2. G. Antibacterial activity against *E. coli*.

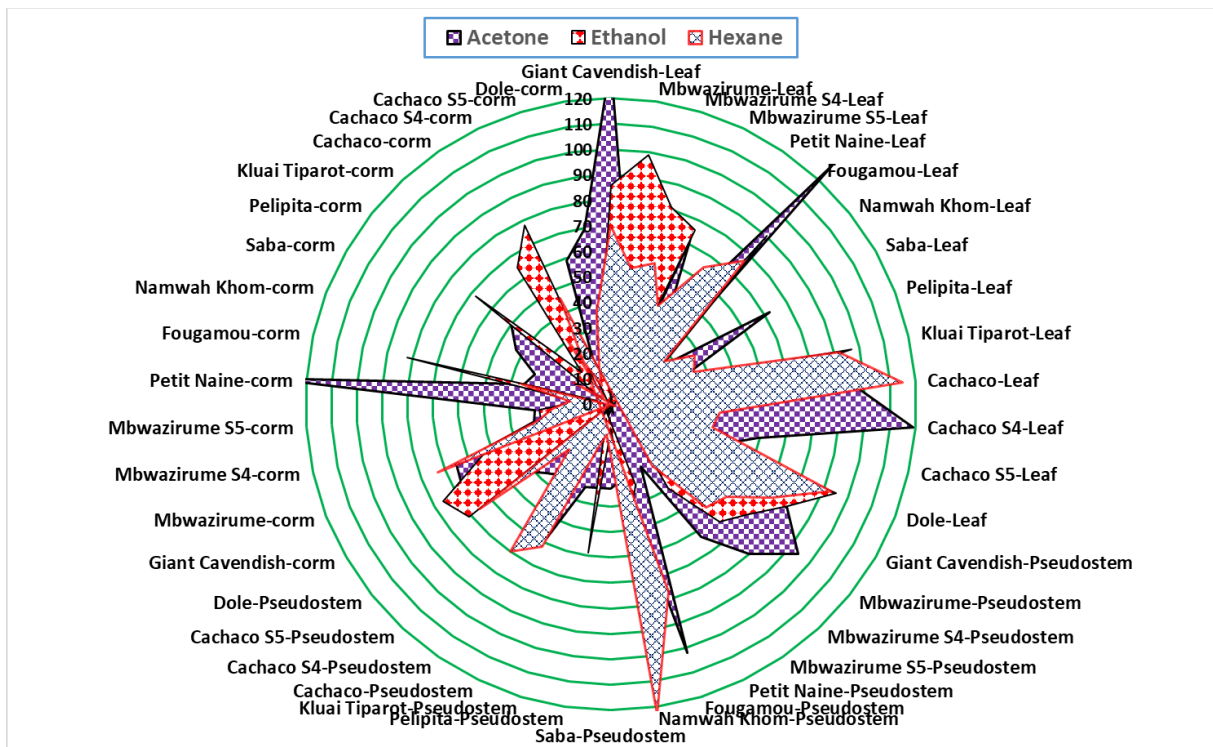

Figure S2. H. Antibacterial activity against *S. enterica*.

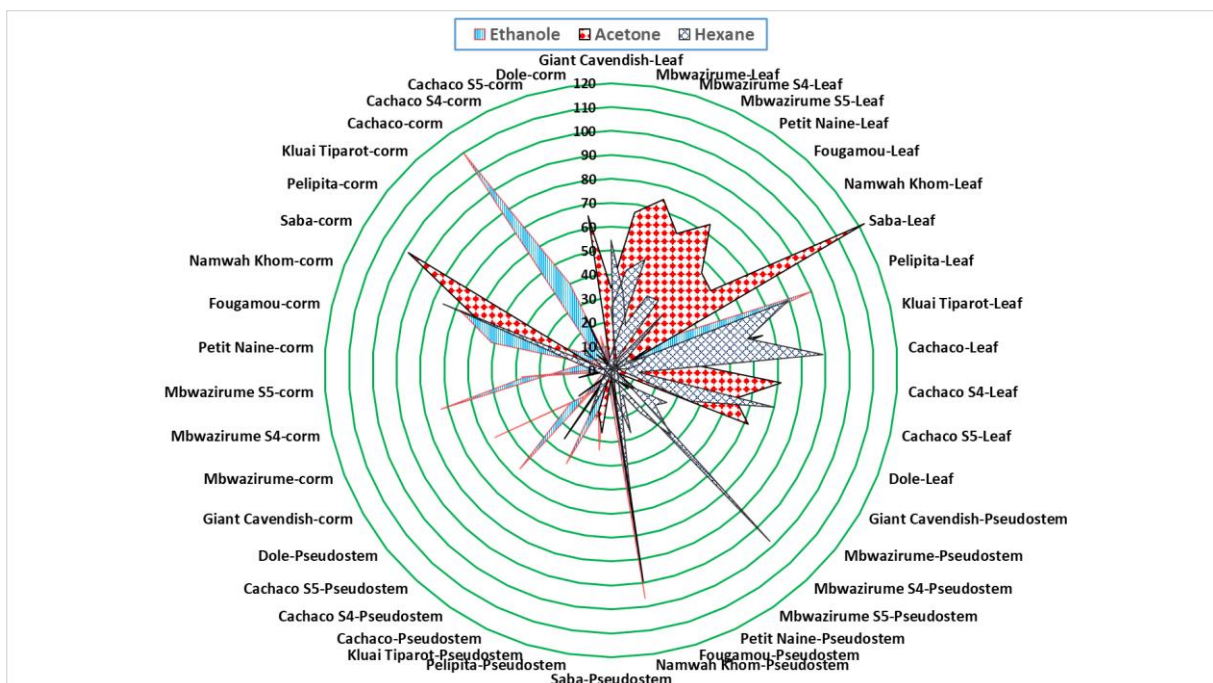

Figure S2. I. Antibacterial activity against *S. sonnei*.

Figure S2. Spider plot of antimicrobial activity against various pathogens, of extracts from different banana plant parts prepared in three different organic solvents.

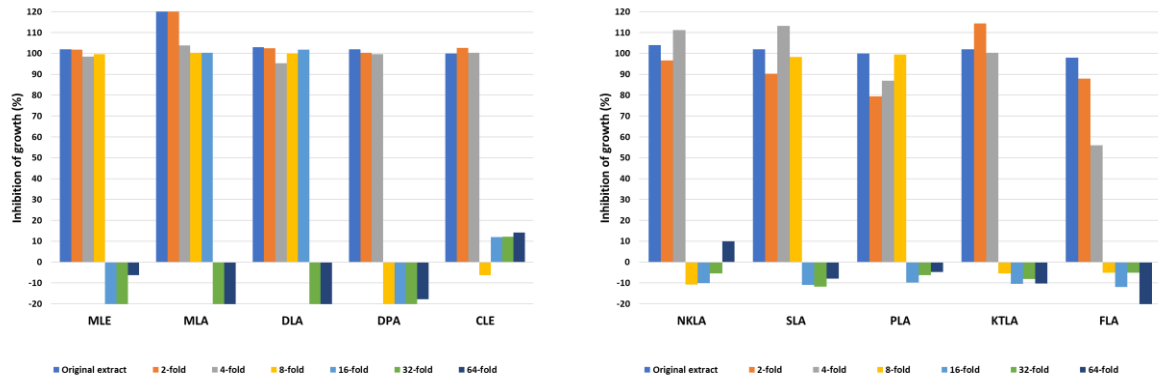

**Figure S3. A.** Growth inhibition of *Bacillus cereus* by dilution series of selected extracts that show the strongest inhibition (>90% by original extract).

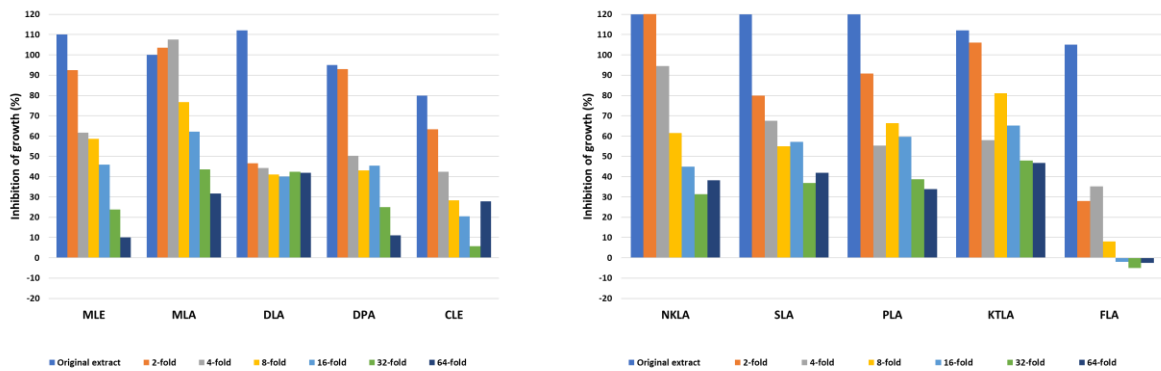

**Figure S3. B.** Growth inhibition of *Micrococcus luteus* by dilution series of selected extracts that show the strongest inhibition (>90% by original extract).

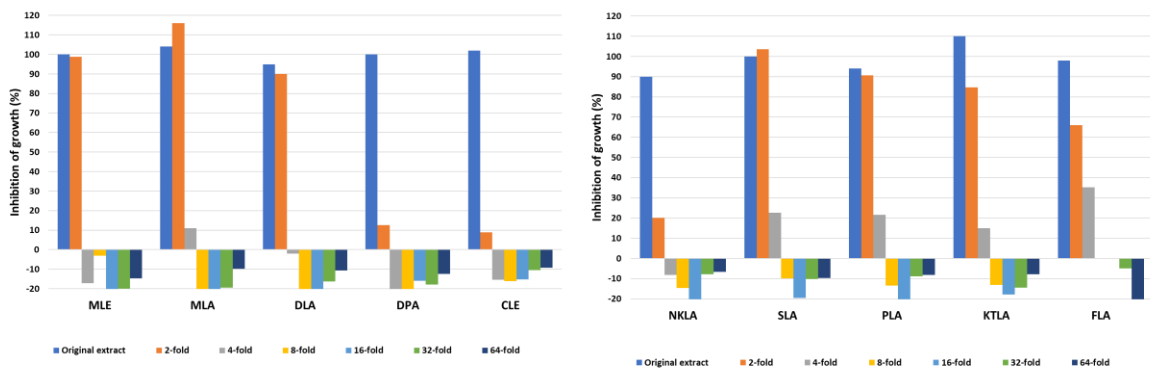

**Figure S3. C.** Growth inhibition of *Staphylococcus aureus* by dilution series of selected extracts that show the strongest inhibition (>90% by original extract).

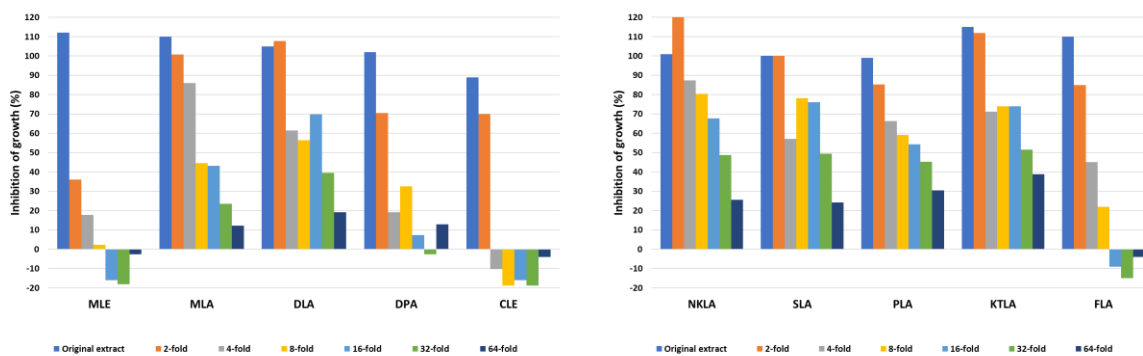

**Figure S3. D.** Growth inhibition of *Streptococcus faecalis* by dilution series of selected extracts that show the strongest inhibition (>90% by original extract).

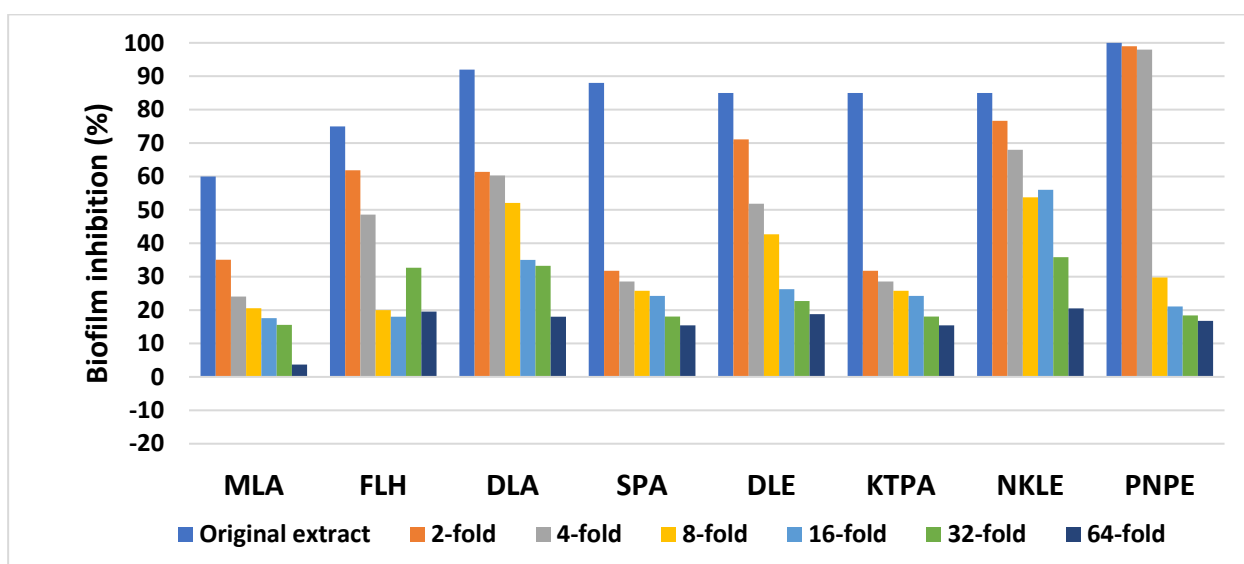

**Figure S3. E.** Inhibition of *Candida albicans* biofilm formation by dilution series of selected extracts that show the strongest inhibition (>60% by original extract).

**Legend:** A two-fold serial dilution series was prepared of all original extracts that showed > 90% growth inhibition (>60% biofilm formation in case of *Candida*). Growth inhibition was estimated from OD measurements of the inoculated well treated with the extract (corrected for the contribution of the extract itself), compared to a solvent control (DMSO). For sample codes, see table below.

| Code | cultivar, plant part, solvent      |
|------|------------------------------------|
| CLE  | Cachaco, leaf, ethanol             |
| DLA  | Dole, leaf, acetone                |
| DLE  | Dole, leaf, ethanol                |
| FLA  | Fougamou, leaf, acetone            |
| FLH  | Fougamou, leaf, hexane             |
| KTLA | Kluai tiparot, leaf, acetone       |
| KTPA | Kluai tiparot, pseudostem, acetone |
| MLA  | Mbwazirume, leaf, acetone          |
| MLE  | Mbwazirume, leaf, ethanol          |
| NKLA | Namwa Khom, leaf, acetone          |
| NKLE | Namwa Khom, leaf, ethanol          |
| PLA  | Pelipita, leaf, acetone            |
| PNPE | Petite naine, pseudostem, ethanol  |



---

|     |                           |
|-----|---------------------------|
| SLA | Saba, leaf, acetone       |
| SPA | Saba, pseudostem, acetone |

---
